# Supplementary material
Source: PubMed Central journal article supplement (PMC3400279)

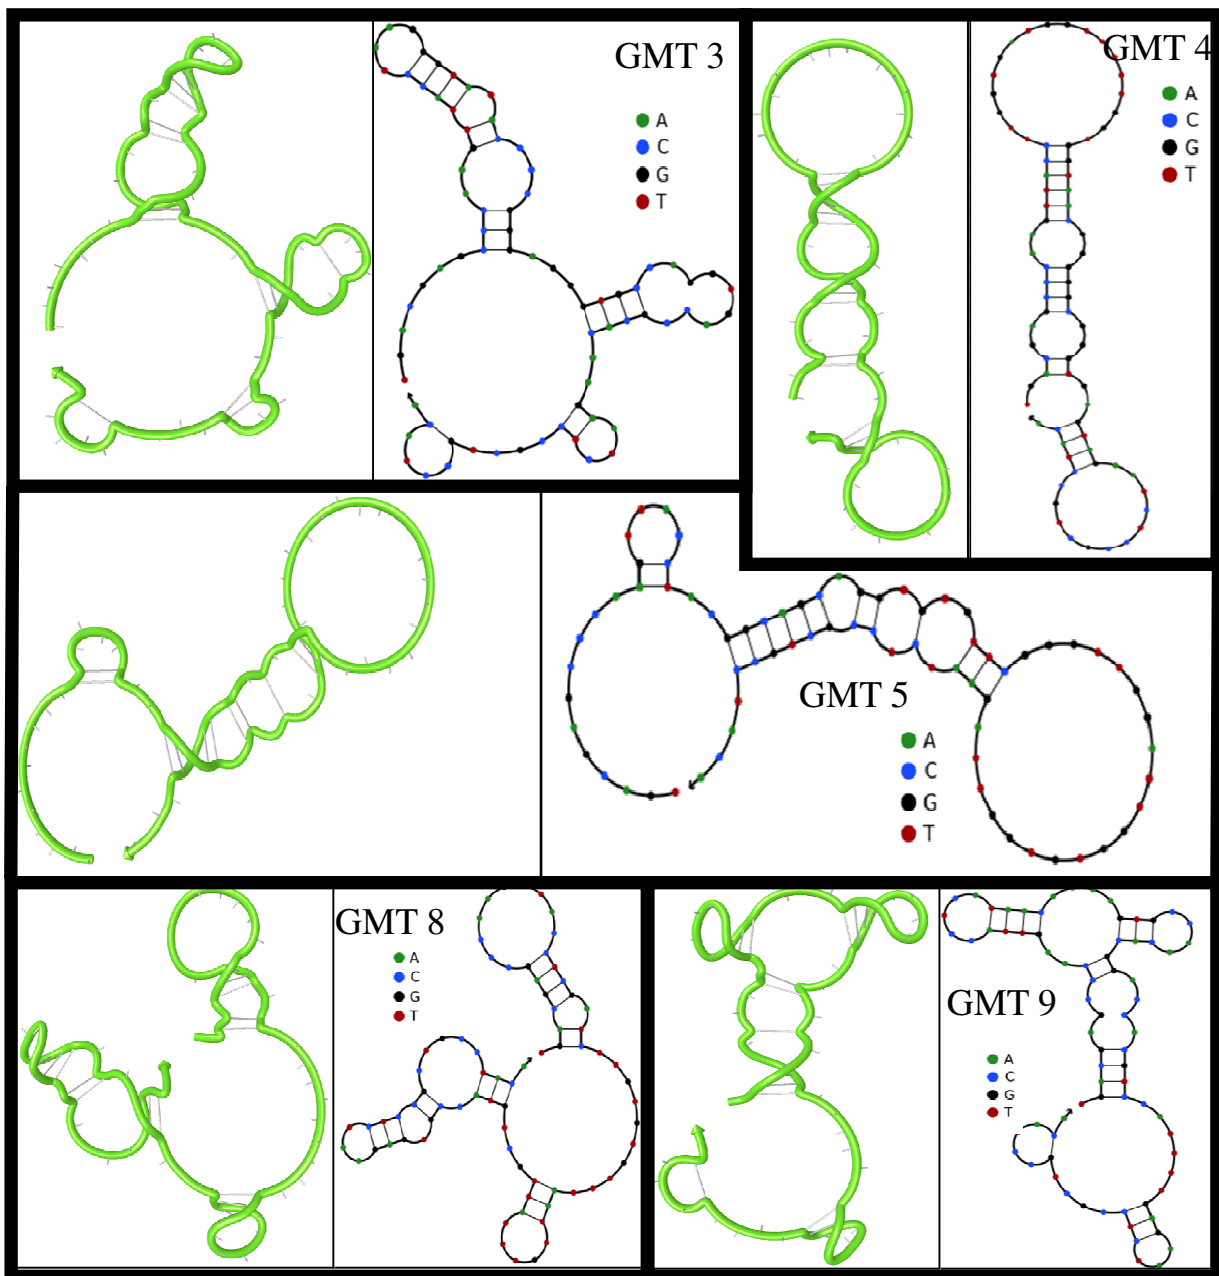

Figure S-1. Secondary structure analysis of selected aptamers.

Supplement: cn100114k_si_001.pdf [file cn100114k_si_001.pdf]
